# Supplementary material
Source: Research Square preprint supplement (doi:10.21203/rs.3.rs-9031470/v1)
Supplement: Supplementary file 1 [file 62af287c86658338ed5d9f9e.docx]

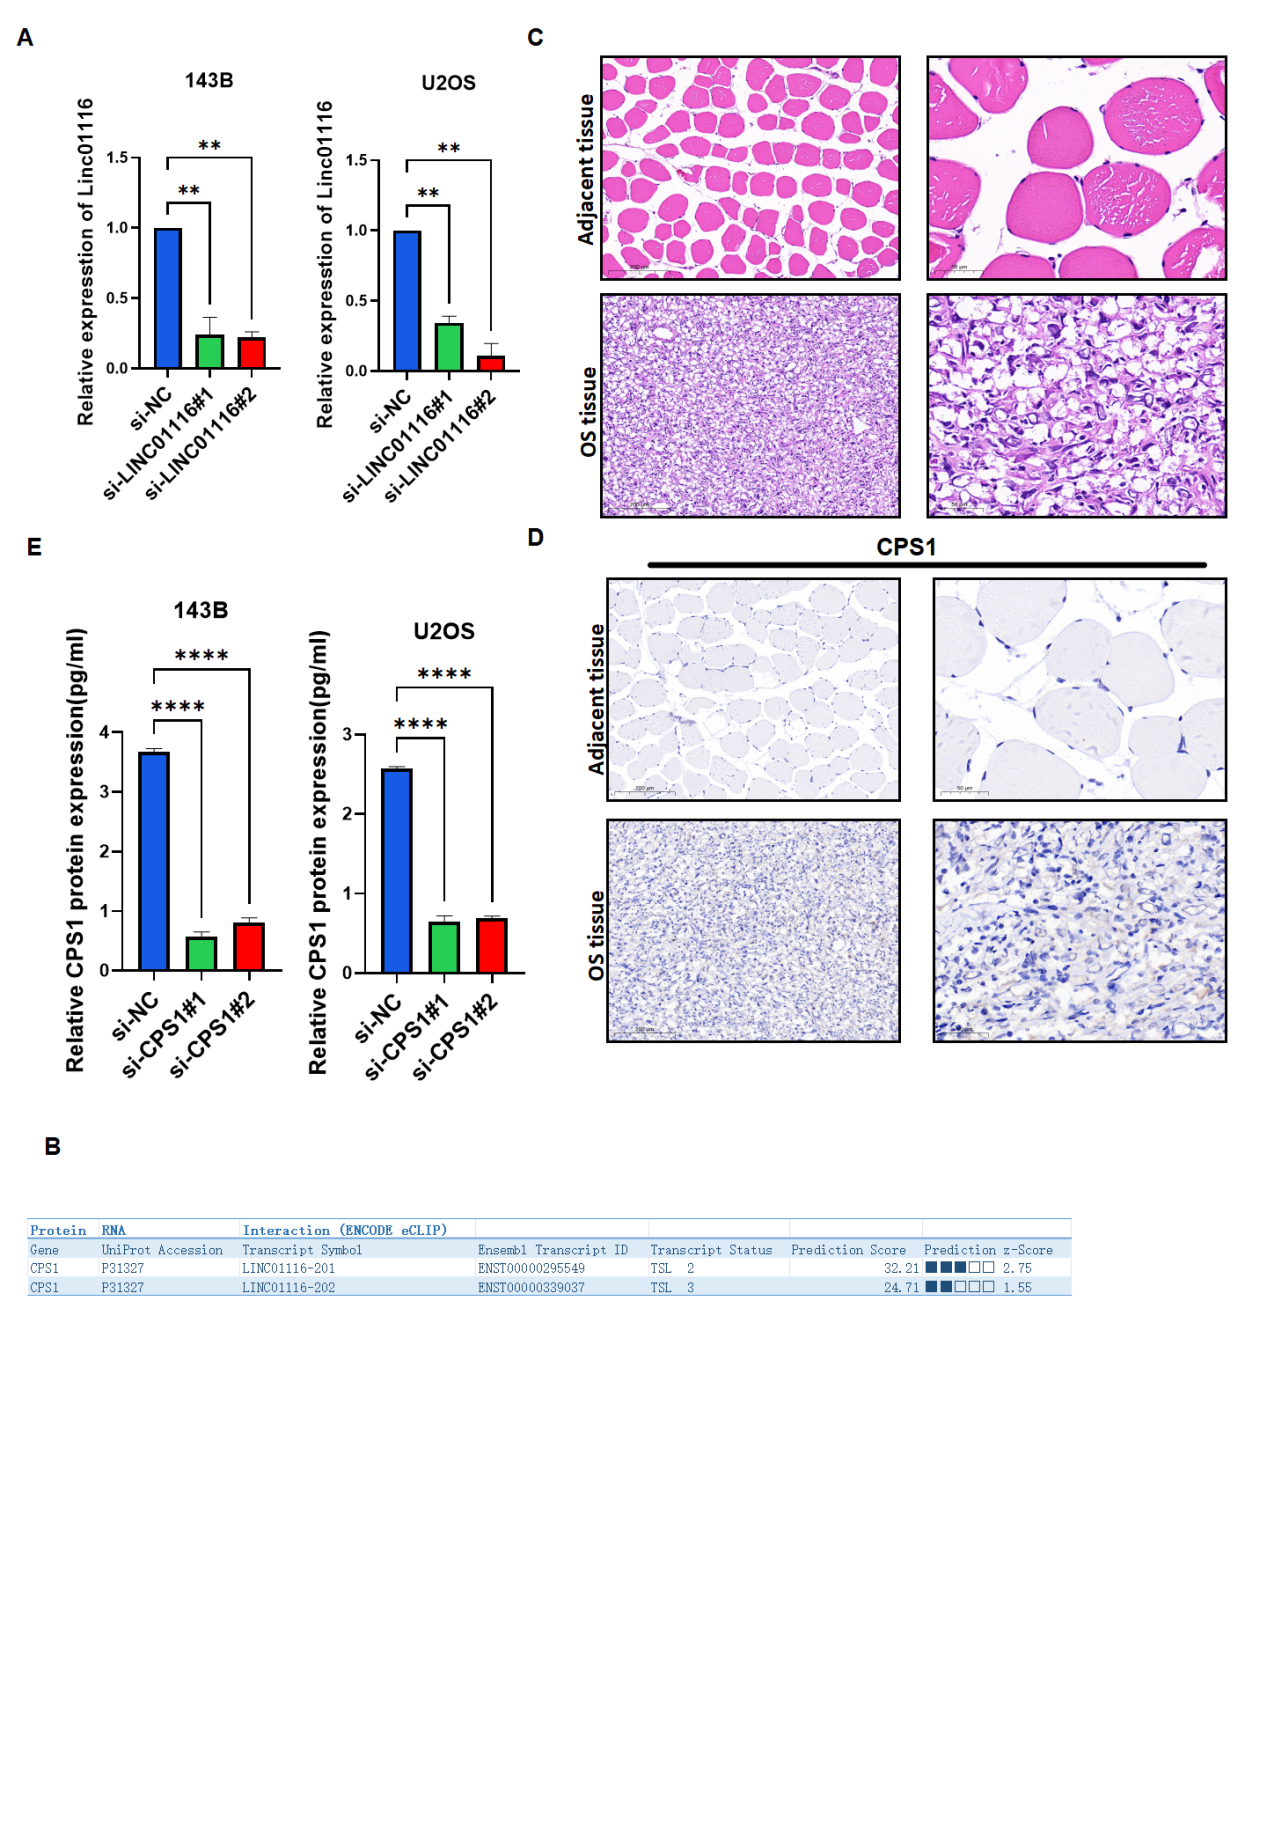


### Figure S1 Validation of key experiments and bioinformatic prediction of LINC01116-CPS1 interaction

(A) LINC01116 siRNA knockdown efficiency in 143B and U2OS cells.(B) catRAPID prediction of LINC01116-CPS1 interaction.(C) H&E staining of osteosarcoma and adjacent non-tumor tissues.(D) CPS1 IHC staining of osteosarcoma and adjacent non-tumor tissues.(E) CPS1 siRNA knockdown efficiency in 143B and U2OS cells.
