# Supplementary material
Source: Research Square preprint supplement (doi:10.21203/rs.3.rs-9031470/v1)
Supplement: Supplementary file 2 [file 8d1ce4472e7768230e4ae539.xlsx]

## Sheet: Sheet2
qpcr 引物序列
LINC01116 Forward	CGCTTTGCTGAAGACGAGC
LINC01116 Reverse	ATATTGAACTGAGCGGGGCT
CPS1 2 F	ACTTCAGTTGAGTCCATTATGGC
CPS1 2 R	GGAACGGATCATCACTGGGTAG

## Sheet: Sheet1
siRNA序列
hLINC01116 si-1	CCAAAGGCCCUGAAGUACACAGUUUTT
sense
hLINC01116 si-2	AAACUGUGUACUUCAGGGCCUUUGGTT
antisense
gene ID 1373
基因名 CPS1
siRNA-1 sense GCUGGCUACCAAGAGUUUAdTdT
siRNA-1 antisense UAAACUCUUGGUAGCCAGCdCdA
siRNA-2 sense GCUCUUGCAGAACCACUAAdTdT
siRNA-2 antisense UUAGUGGUUCUGCAAGAGCdTdG
1. 基因合成+PCR克隆
Item	基因合成+PCR克隆
Project ID	H55704-1
Gene name	LINC01116		模板为H48764-1的目的序列
Gene length	2306bp
Vector	pcDNA3.1(+)-EGFP		Ampicillin	载体为H38962-2的最终构建
Clone site	NheI and BamHI
Delivery form	冻干质粒一管	2-5ug/tube			甘油菌一管
Comments
目的基因序列：
GCTAGCCTCTCCAAGCTGCTCCGAGGGGAATGGGGAATCGGCAGGAAATGACCCGAACTGCCAGCCTGCGCCTTTGCAGCCGGCCCTCGCTTTGCTGAAGACGAGCAGCTCCCACCAAAGTCTTGCCTCCCCTTACCCCGAAAGCCCCGCTCAGTTCAATATTTCAAGTGAAAATCTGCCTGTTCGAAAAGAAAATATTCACAAATGAGCAGTGTATTAGAAGACAACTGAATTGCTTCTAAGAATGGGTCTCACTCTGCCATCACCCAGGCTGGAGTGTGGTGGCACCATCATGGCTCACTGCAGCCTTGAACTCCTGAGCTCAAGTCATCCTCCCACCTCAGCCTTCCGAGTAGCTGGAACTGCAGGTGTGAGCCACCATGCCTGGCTGATTTGTCT…
载体序列：
GACGGATCGGGAGATCTCCCGATCCCCTATGGTGCACTCTCAGTACAATCTGCTCTGATGCCGCATAGTTAAGCCAGTATCTGCTCCCTGCTTGTGTGTTGGAGGTCGCTGAGTAGTGCGCGAGCAAAATTTAAGCTACAACAAGGCAAGGCTTGACCGACAATTGCATGAAGAATCTGCTTAGGGTTAGGCGTTTTGCGCTGCTTCGCGATGTACGGGCCAGATATACGCGTTGACATTGATTATTGACTAGTTATTAATAGTAATCAATTACGGGGTCATTAGTTCATAGCCCATATATGGAGTTCCGCGTTACATAACTTACGGTAAATGGCCCGCCTGGCTGACCGCCCAACGACCCCCGCCCATTGACGTCAATAATGACGTATGTTCCCATAG…
最终构建：
GACGGATCGGGAGATCTCCCGATCCCCTATGGTGCACTCTCAGTACAATCTGCTCTGATGCCGCATAGTTAAGCCAGTATCTGCTCCCTGCTTGTGTGTTGGAGGTCGCTGAGTAGTGCGCGAGCAAAATTTAAGCTACAACAAGGCAAGGCTTGACCGACAATTGCATGAAGAATCTGCTTAGGGTTAGGCGTTTTGCGCTGCTTCGCGATGTACGGGCCAGATATACGCGTTGACATTGATTATTGACTAGTTATTAATAGTAATCAATTACGGGGTCATTAGTTCATAGCCCATATATGGAGTTCCGCGTTACATAACTTACGGTAAATGGCCCGCCTGGCTGACCGCCCAACGACCCCCGCCCATTGACGTCAATAATGACGTATGTTCCCATAG…
